# Supplementary material for: Effect of Delivery Format on Student Outcomes and Perceptions of a Veterinary Medicine Course: Synchronous Versus Asynchronous Learning
Source: MDPI journal article supplement (doi:10.3390/vetsci8020013), 2021-01-20
Supplement: s1 [file s1]

## Effect of Delivery Format on Student Outcomes and Perceptions of a Veterinary Medicine Course: Synchronous versus Asynchronous Learning

### Supplementary Data

**Table S1. Outline of in-person lectures included in the 2019 synchronous toxicology course. Materials covered on the final exams began with lecture 13.**

| Lecture    | Main topic                                                                                           |
|------------|------------------------------------------------------------------------------------------------------|
| Lecture 1  | Introduction to course; taking the toxicologic history                                               |
| Lecture 2  | Dose-response relationships; using toxicity data                                                     |
| Lecture 3  | Diagnostic laboratory and introduction to treatment                                                  |
| Lecture 4  | Management continued                                                                                 |
| Lecture 5  | Management continued                                                                                 |
| Lecture 6  | Neurotoxic poisonous plants                                                                          |
| Lecture 7  | Neurotoxic poisonous plants continued. Neurotoxic pesticides.                                        |
| Lecture 8  | Bromethalin and lead. Introduction to other metals.                                                  |
| Lecture 9  | Lead poisoning. Intro to toxic plants that affect the gastrointestinal tract                         |
| Lecture 10 | Plants that affect the gastrointestinal tract continued (e.g., pokeweed, castor bean).<br>Iron       |
| Lecture 11 | Zinc and copper (copper affects multiple organ systems - renal and hepatic)                          |
| Lecture 12 | Toxic foods (small animals)                                                                          |
| Lecture 13 | Feed related toxicants that affect livestock: urea/NPN and nitrates/nitrites                         |
| Lecture 14 | Feed related toxicants that affect livestock: ionophores and salt                                    |
| Lecture 15 | Cardiac glycosides and start of cyanogenic plants                                                    |
| Lecture 16 | Cyanogenic plants/cyanide continued. Start of toxic gases                                            |
| Lecture 17 | Toxic gases continued. Acute Bovine Pulmonary Edema and Emphysema                                    |
| Lecture 18 | Agents that target blood (e.g., anticoagulant rodenticides). Begin renal toxicants (pigweed).        |
| Lecture 19 | Renal toxicants continued (oak, lily, ethylene glycol)                                               |
| Lecture 20 | Renal toxicants continued (ethylene glycol continued, cholecalciferol).                              |
| Lecture 21 | Teratogens. Start hepatotoxicants.                                                                   |
| Lecture 22 | Hepatotoxic agents: Death cap mushrooms, <i>Crotalaria spp</i> , aflatoxins                          |
| Lecture 23 | Hepatotoxic agents continued: Cycads. Photosensitizers (primary vs. secondary).<br>Venomous animals. |
| Lecture 24 | Miscellaneous Top 10 Agents for Dogs and Cats: NSAIDs, acetaminophen, fipronil                       |

**Table S2. Outline of topics included in the 2020 asynchronous toxicology course. Items identified with blue shading were considered supplemental materials. Materials covered on the Midterm and final exams began with Topics 4 and 49, respectively.**

| Topic #                                                                     | Title                                             | Approximate Length (min:sec) |
|-----------------------------------------------------------------------------|---------------------------------------------------|------------------------------|
| <b>Introduction to the Course and Veterinary Toxicology</b>                 |                                                   |                              |
| 1                                                                           | Greetings from Finland                            | 7:15                         |
| 2                                                                           | Introduction to Course                            | 6:50                         |
| 3                                                                           | Careers in Veterinary Toxicology                  | 9:40                         |
| <b>Unit I: Concepts in Veterinary Toxicology</b>                            |                                                   |                              |
| 4                                                                           | Taking the Toxicological History                  | 8:25                         |
| 5                                                                           | Dose Response Relationships                       | 12:20                        |
| 6                                                                           | Sources of Toxicity Data                          | 11:15                        |
| 7                                                                           | Factors that Influence Toxicity                   | 8:15                         |
| 8                                                                           | Hazard versus Risk                                | 5:10                         |
| <b>Unit II: General Approaches to Diagnosis and Management of Toxicoses</b> |                                                   |                              |
| 9                                                                           | Introduction to Veterinary Forensics (Toxicology) | 11:20                        |
| 10                                                                          | The Toxicological Necropsy                        | 4:30                         |
| 11                                                                          | The Toxicological Field Investigation             | 8:15                         |
| 12A                                                                         | How Confident Are You With Your Diagnosis?        | 9:20                         |
|                                                                             | Part A. Causality                                 |                              |
| 12B                                                                         | How Confident Are You With Your Diagnosis?        | 8:10                         |
|                                                                             | Part B. Application to Clinical Toxicology        |                              |
| 12C                                                                         | How Confident Are You With Your Diagnosis?        | 11:50                        |
|                                                                             | Part C. Practice Examples                         |                              |
| 13                                                                          | Management of Corrosive Exposures                 | 14:20                        |
| 14                                                                          | Emetics                                           | 12:25                        |
| 15                                                                          | Gastric and Rumen Lavage                          | 8:25                         |
| 16                                                                          | Adsorbents and Cathartics                         | 12:35                        |
| 17                                                                          | Direct Removal of an Ingested Toxicant            | 3:25                         |
| 18A                                                                         | Direct Removal of an Ingested Toxicant. Part A.   | 7:35                         |
|                                                                             | Ion Trapping                                      |                              |
| 18B                                                                         | Direct Removal of an Ingested Toxicant. Part B.   | 6:55                         |
|                                                                             | Diuresis and Extracorporeal Methods               |                              |
| 18C                                                                         | Direct Removal of an Ingested Toxicant. Part C.   | 5:15                         |
|                                                                             | Lipid Therapy                                     |                              |
| 18D                                                                         | Direct Removal of an Ingested Toxicant. Part D.   | 9:00                         |
|                                                                             | Chelation                                         |                              |
| 19                                                                          | Antidotes                                         | 5:20                         |
| 20                                                                          | Dermal and Ocular Exposures                       | 6:00                         |
| <b>Unit III: Introduction to Organ Systems Toxicology</b>                   |                                                   |                              |
| 21                                                                          | Veterinary Toxicology Textbooks                   | 5:05                         |
| 22                                                                          | Mechanisms of Action                              | 6:35                         |
| 23                                                                          | Dose-Dependent Transitions                        | 6:45                         |
| 24                                                                          | Conditions of Plant Poisoning                     | 13:05                        |
| 25                                                                          | Introduction to Organ System Toxicology           |                              |
| 25A                                                                         | Introduction to Neurotoxicology                   | 15:45                        |
| 25B                                                                         | Introduction to Renal Toxicology                  | 14:45                        |

|     |                                           |       |
|-----|-------------------------------------------|-------|
| 25C | Introduction to Hepatic Toxicology        | 16:25 |
| 25D | Introduction to Inhalation Toxicology     | 20:05 |
| 25E | Introduction to Cardiovascular Toxicology | 32:55 |
| 25F | Introduction to Reproductive Toxicology   | 20:05 |
| 25G | Introduction to Developmental Toxicology  | 16:15 |
| 25H | Introduction to Carcinogenicity           | 28:25 |

#### Unit IV: Neurotoxicants

|     |                                                     |       |
|-----|-----------------------------------------------------|-------|
| 26  | Nicotine                                            | 15:05 |
| 27  | Marijuana                                           | 13:50 |
| 28  | Yellow Star Thistle                                 | 6:05  |
| 29  | Fumonisin                                           | 9:05  |
| 30  | Larkspur                                            | 9:45  |
| 31  | Locoweed                                            | 17:55 |
| 32A | Cholinesterase Inhibitors                           | 22:25 |
| 32B | Cholinesterase Inhibitors: Case Example             | 6:25  |
| 33A | Pyrethrin and Pyrethroid Insecticides               | 14:15 |
| 33B | Pyrethrin and Pyrethroid Insecticides: Case Example | 17:55 |
| 34A | Bromethalin                                         | 11:50 |
| 34B | Bromethalin: Case Examples                          | 10:55 |
| 35  | Lead                                                | 25:25 |

#### Unit V: Gastrointestinal Tract (GIT) Toxicants

|    |                                                  |       |
|----|--------------------------------------------------|-------|
| 36 | Overview of GIT Plants (Philodendron, Amaryllis) | 12:30 |
| 37 | Pokeweed                                         | 6:50  |
| 38 | Nightshades                                      | 13:10 |
| 39 | Castor Bean                                      | 10:00 |
| 40 | Iron                                             | 19:30 |
| 41 | Zinc                                             | 16:00 |
| 42 | Copper                                           | 19:25 |

#### Unit VI: Toxic Foods (Small Animal)

|    |                           |       |
|----|---------------------------|-------|
| 43 | Chocolate                 | 12:35 |
| 44 | Avocado                   | 7:55  |
| 45 | Xylitol                   | 11:30 |
| 46 | Grape                     | 10:15 |
| 47 | Onion                     | 10:35 |
| 48 | Miscellaneous Toxic Foods | 15:25 |

#### Unit VII: Food Animal Toxicants

| Topic # | Title                            | Approximate Length (min:sec) |
|---------|----------------------------------|------------------------------|
| 49      | Nitrate                          | 17:55                        |
| 50      | Urea                             | 13:05                        |
| 51      | Ionophores                       | 19:30                        |
| 52      | Salt Poisoning/Water Deprivation | 21:40                        |
| 53      | Arsenic                          | 34:30                        |

#### Unit VIII: Cardiovascular and Blood Toxicants

|    |                    |       |
|----|--------------------|-------|
| 54 | Cardiac Glycosides | 24:35 |
| 55 | Andromedotoxin     | 8:35  |
| 56 | Japanese Yew       | 10:05 |
| 57 | Cyanide            | 23:25 |

|                                                    |                                              |       |
|----------------------------------------------------|----------------------------------------------|-------|
| 58A                                                | Anticoagulant Rodenticides (Use Trends)      | 4:20  |
| 58B                                                | Anticoagulants (Clinical Toxicology)         | 22:50 |
| 59                                                 | Red Maple                                    | 10:40 |
| 60                                                 | Hymenoptera                                  | 14:45 |
| 61A                                                | North American Venomous Snakes: Coral Snakes | 6:35  |
| 61B                                                | North American Venomous Snakes: Pit Vipers   | 23:40 |
| 62                                                 | Bracken Fern                                 | 10:30 |
| 63A                                                | Radiation                                    | 29:40 |
| 63B                                                | Radon                                        | 7:50  |
| <b>Unit IX: Respiratory Toxicants</b>              |                                              |       |
| 64                                                 | Air Pollution                                | 20:00 |
| 65                                                 | Hydrogen Sulfide                             | 20:50 |
| 66                                                 | Ammonia                                      | 9:50  |
| 67                                                 | Carbon Monoxide                              | 14:30 |
| 68                                                 | Smoke Inhalation                             | 15:15 |
| 69                                                 | Teflon                                       | 10:30 |
| 70                                                 | Acute Bovine Pulmonary Emphysema and Edema   | 15:30 |
| 71                                                 | Zinc Phosphide                               | 15:20 |
| <b>Unit X: Renal Toxicants</b>                     |                                              |       |
| 72                                                 | Pigweed                                      | 9:35  |
| 73                                                 | Halogeton                                    | 8:25  |
| 74                                                 | Oak                                          | 7:15  |
| 75                                                 | Lilies                                       | 6:00  |
| 76                                                 | Ethylene Glycol                              | 20:10 |
| 77                                                 | Cholecalciferol                              | 15:10 |
| 78                                                 | NSAIDs                                       | 17:20 |
| 79                                                 | Blister Beetle                               | 11:45 |
| 80                                                 | Ochratoxin A                                 | 12:00 |
| <b>Unit XI: Teratogens</b>                         |                                              |       |
| 81                                                 | Veratrum                                     | 10:10 |
| 82                                                 | Fescue                                       | 20:10 |
| <b>Unit XII: Hepatotoxic and Phototoxic Agents</b> |                                              |       |
| 83A                                                | Mushrooms (Identification)                   | 11:30 |
| 83B                                                | Mushrooms (Amanita Mushrooms)                | 10:00 |
| 84                                                 | Pyrrolizidine Alkaloids                      | 14:45 |
| 85                                                 | Aflatoxin                                    | 21:00 |
| 86                                                 | Acetaminophen                                | 12:25 |
| 87                                                 | Cycads                                       | 10:20 |
| 88                                                 | Blue Green Algae                             | 19:40 |
| 89                                                 | Photosensitization                           | 16:35 |
| <b>Unit XIII: Miscellaneous Topics</b>             |                                              |       |
| 90A                                                | Small Animal Top Ten: Fertilizer             | 4:15  |
| 90B                                                | Small Animal Top Ten: ADHD Stimulant Drugs   | 12:55 |
